# Supplementary material for: Enhancement of Ce1−xSnxO2 support in LaMnO3 for the catalytic oxidation and adsorption of elemental mercury
Source: Royal Society of Chemistry journal article supplement (doi:10.1039/c6ra10006f), 2016-01-01
Supplement: c6ra10006f1.pdf [file c6ra10006f1.pdf]

## Supporting Information

### Materials Characterization

The as-prepared materials were characterized by means of the following techniques. The BET surface areas were performed on a Quantachrome Nova 2200e Automated Gas Sorption system. All samples were degassed at 200°C in a nitrogen flow prior to N<sub>2</sub> physisorption at -196°C. The pore diameter and pore volume were calculated by BJH method. The crystal structure of LaMnO<sub>3</sub> perovskite oxide structure, the mixture of Ce-Sn binary oxides and their composites were determined using powder X-ray Diffraction Patterns (XRD) (APLX-DUO, BRUKER, Germany), and the scanning range was from 10° to 80° with a scanning velocity of 7° min<sup>-1</sup> with Cu-Kα radiation. Raman spectroscopy was used for the determination of the crystallinity degree of the materials. The analyses were performed in a SENTERRA R200 microscope. The 633 nm line of Ar<sup>+</sup> laser was used for the excitation. The reducibility of the materials was conducted by H<sub>2</sub>-TPR experiments, which was performed on Chemisorp TPx 2920 instrument, the materials were firstly degassed at 300°C for 3 h under Ar atmosphere before H<sub>2</sub>-TPR test, the reducing gas was 10% H<sub>2</sub>/Ar. X-ray photoelectron spectroscopy (XPS) was carried out on a Shimadzu-Kratos system to examine the valance states of elements on the surface of materials, coupled with an ultra DLD spectrometer with Al Kα as the excitation source. C 1s line at 284.6 eV was taken as a reference for the binding energy calibration.
